# Supplementary material for: Cerium doped nickel-oxide nanostructures for riboflavin biosensing and antibacterial applications
Source: Royal Society of Chemistry journal article supplement (doi:10.1039/c5nj03539b), 2016-01-01
Supplement: c5nj03539b1.pdf [file c5nj03539b1.pdf]

## Supplementary Information

Cerium doped nickel-oxide nanostructures for riboflavin biosensing and antibacterial applications

Muthukumaran P<sup>1</sup>, Chikkili Venkateswara Raju<sup>2</sup>, Sumathi C<sup>1</sup>, S, Ravi G<sup>3</sup>, Solairaj D<sup>4</sup>, Rameshthangam P<sup>4</sup>, Wilson J<sup>1, #</sup>, Subbiah Alwarappan<sup>5, #</sup>, Sathish Rajendran<sup>5</sup>

<sup>1</sup> Polymer Electronics Lab, Department of Bioelectronics and Biosensors, Alagappa University, Karaikudi-630004, Tamilnadu, India. E-mail: [wilson.j2008@yahoo.com](mailto:wilson.j2008@yahoo.com)

<sup>2</sup> Electrodes and Electrocatalysis Division, CSIR- Central Electrochemical Research Institute Karaikudi, Tamilnadu, India- 630006

<sup>3</sup> Department of Biotechnology, DDE (Science Wing), Alagappa University, Karaikudi Tamil Nadu 630 004, India

<sup>4</sup> Photonic Crystals Lab, Department of Physics, Alagappa University, Karaikudi-630004, Tamilnadu, India

<sup>5</sup> Bio-Electrochemistry Group, CSIR-Central Electrochemical Research Institute, Karaikudi 630 003, Tamilnadu, India.

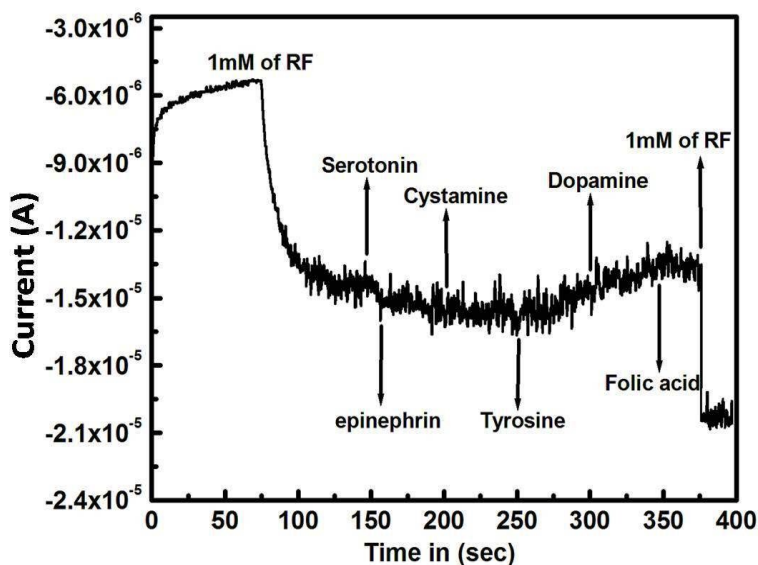

**Figure S1.** Amperometric *i-t* curve for the addition of 1 mM of RF and 10 mM (10 fold) serotonin, epinephrine, cystamine, dopamine, tyrosine and final addition of 1 mM of RF at 5 wt.% Ce-NiO modified electrode in PBS (pH 7.2). Its applied potential -0.50 V.

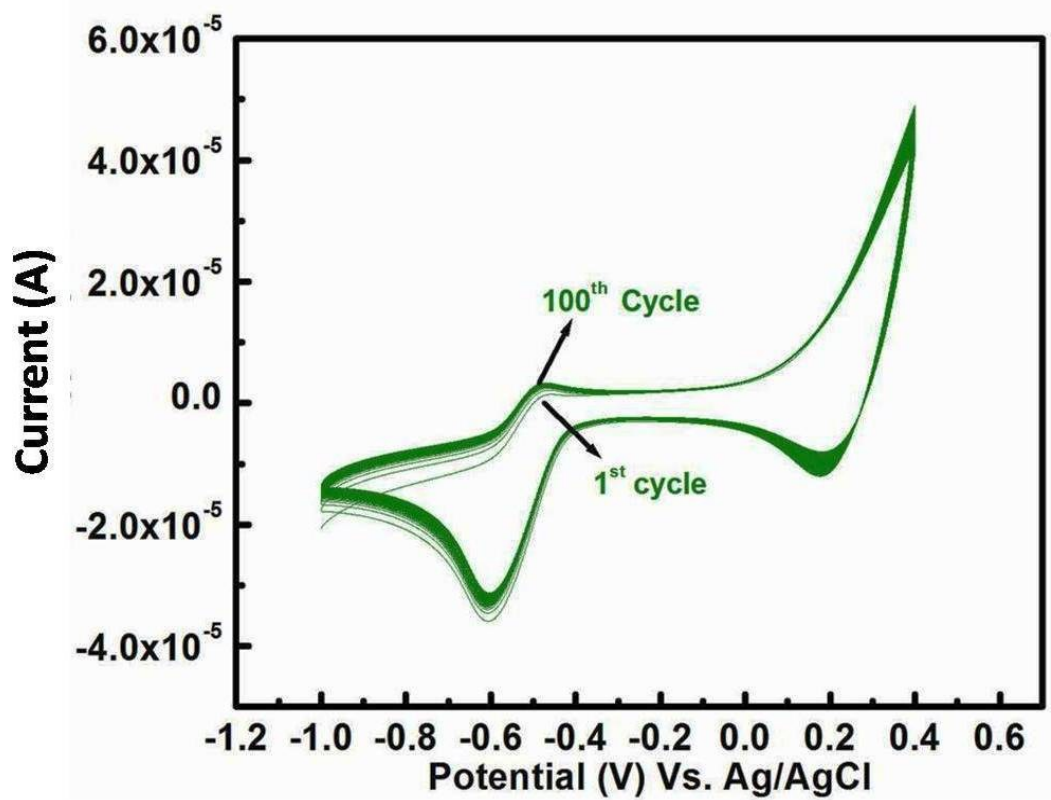

**Figure S2.** 100 cycles of CVs of the modified GCE in presence of 1.0 mM RF 0.1 M KCl at a scan rate of  $100 \text{ mV s}^{-1}$

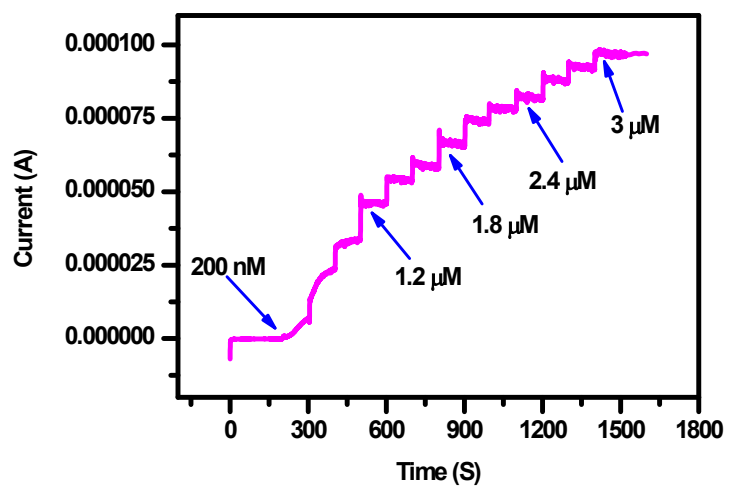

Figure S3. Amperometric responses at 5wt. % of Ce doped NiO modified GCE upon periodical addition of RF into 0.1M PBS at -0.5V

**Table S1** Crystallite Size for different percentage of Ce doping with NiO Samples

| S.No | Sample                 | Size in nm |
|------|------------------------|------------|
| 1    | Pure NiO               | 90         |
| 2    | 1 wt.% of Ce doped NiO | 85         |
| 3    | 3 wt.% of Ce doped NiO | 74         |
| 4    | 5 wt.% of Ce doped NiO | 72         |
| 5    | 7 wt.% of Ce doped NiO | 57         |
| 6    | 9 wt.% of Ce doped NiO | 41         |

**Table S2** Zone of inhibition (ZI), MIC and MBC values of sample a-f against various bacterial strains

| Bacteria             | Sample a |                                 |                                 | Sample b |                                 |                                 | Sample c |                                 |                                 | Sample d |                                 |                                 | Sample e |                                 |                                 | Sample f |                                 |                                 |
|----------------------|----------|---------------------------------|---------------------------------|----------|---------------------------------|---------------------------------|----------|---------------------------------|---------------------------------|----------|---------------------------------|---------------------------------|----------|---------------------------------|---------------------------------|----------|---------------------------------|---------------------------------|
|                      | ZI (mm)  | MIC ( $\mu\text{g}/\text{mL}$ ) | MBC ( $\mu\text{g}/\text{mL}$ ) | ZI (mm)  | MIC ( $\mu\text{g}/\text{mL}$ ) | MBC ( $\mu\text{g}/\text{mL}$ ) | ZI (mm)  | MIC ( $\mu\text{g}/\text{mL}$ ) | MBC ( $\mu\text{g}/\text{mL}$ ) | ZI (mm)  | MIC ( $\mu\text{g}/\text{mL}$ ) | MBC ( $\mu\text{g}/\text{mL}$ ) | ZI (mm)  | MIC ( $\mu\text{g}/\text{mL}$ ) | MBC ( $\mu\text{g}/\text{mL}$ ) | ZI (mm)  | MIC ( $\mu\text{g}/\text{mL}$ ) | MBC ( $\mu\text{g}/\text{mL}$ ) |
| <i>K. pneumoniae</i> | -        | >100                            | >100                            | -        | >100                            | >100                            | 9        | 70                              | 80                              | 11       | 30                              | 40                              | 10       | 30                              | 40                              | -        | >100                            | >100                            |
| <i>S. typhi</i>      | 13       | 30                              | 30                              | 9        | 80                              | 90                              | 15       | 30                              | 40                              | 17       | 20                              | 30                              | 15       | 20                              | 30                              | 12       | 40                              | 50                              |
| <i>P. aeruginosa</i> | 12       | 50                              | 60                              | 10       | 60                              | 70                              | 11       | 40                              | 50                              | 14       | 30                              | 40                              | 11       | 50                              | 60                              | 10       | 60                              | 70                              |
| <i>B. cereus</i>     | 12       | 50                              | 60                              | 10       | 60                              | 60                              | 12       | 50                              | 50                              | 14       | 30                              | 40                              | 11       | 30                              | 40                              | 10       | 40                              | 40                              |
| <i>B. subtilis</i>   | 17       | 20                              | 30                              | 15       | 20                              | 20                              | 20       | 10                              | 20                              | 22       | 10                              | 10                              | 17       | 10                              | 20                              | 15       | 20                              | 30                              |
| <i>S. aureus</i>     | 17       | 20                              | 20                              | 14       | 20                              | 30                              | 15       | 20                              | 20                              | 18       | 10                              | 20                              | 16       | 20                              | 30                              | 13       | 30                              | 30                              |

\* The values are mean of triplicate experiments

**Table S3** Comparison of the efficiency of reported electrochemical methods in the determination of RF

| Electrode                                                      | limit of detection                                                                                            | linear range                                                 | reference |
|----------------------------------------------------------------|---------------------------------------------------------------------------------------------------------------|--------------------------------------------------------------|-----------|
| (1) P3MT/GCE                                                   | $5.0 \times 10^{-8} \text{ mol L}^{-1}$                                                                       | $1.0 \times 10^{-7} - 2.0 \times 10^{-4} \text{ mol L}^{-1}$ | [1]       |
| (2) Aza / PCPE                                                 | $0.2 \text{ ng cm}^{-1}$                                                                                      | $0.5 \text{ ng cm}^{-3}$ to $70 \mu\text{g cm}^{-3}$         | [2]       |
| (3) DNA/CNT                                                    | $0.2 \text{ ng L}^{-1}$                                                                                       | $5.31 \times 10^{-13} \text{ mol L}^{-1}$ -                  | [3]       |
| (4) C -18/AuE                                                  | $2.3 \mu\text{g mL}^{-1}$                                                                                     | -                                                            | [4]       |
| (5) CILE                                                       | $0.1 \text{ nM}$                                                                                              | $0.8 - 110 \text{ nM}$                                       | [5]       |
| (6) Ag amalgam film                                            | $0.009$                                                                                                       | $0.05 - 3$                                                   | [6]       |
| (7) AgSAEs                                                     | $8.2 \times 10^{-10} \text{ mol L}^{-1}$ (m - AgSAE) and<br>$1.3 \times 10^{-9} \text{ mol L}^{-1}$ (p-AgSAE) | -                                                            | [7]       |
| (8) $\text{WO}_3 - \text{TiO}_2 / \text{ITO}$                  | $1.87 \times 10^{-7} \text{ M}$                                                                               | $3.23 \times 10^{-7}$ to $4.0 \times 10^{-5} \text{ M}$      | [8]       |
| (9) Ds-DNA/ PCE                                                | $0.34 \mu\text{g mL}^{-1}$                                                                                    | $0.5 - 70 \mu\text{g mL}^{-1}$                               | [9]       |
| (10) Cr- $\text{SnO}_2 / \text{GCE}$                           | $107 \text{ nM}$                                                                                              | $0.2 \times 10^{-6}$ to $1.0 \times 10^{-4} \text{ M}$       | [10]      |
| (11) $\alpha - \text{Fe}_2\text{O}_3/\text{MWCNT}/\text{AuNP}$ | $6 \text{ nM}$                                                                                                | $50 \times 10^{-9}$ to $600 \times 10^{-6}$                  | [11]      |

## References:

- (1) Zhang, H.; Zhao, J.; Liu, H.; Wang, H.; Liu, R.; Liu, J.; Application of Poly (3-methylthiophene) Modified Glassy Carbon Electrode as Riboflavin Sensor. *Int. J. Electrochem. Sci.* **2010**, *5*, 295
- (2) Kotkar, M.; Desai P,B.; Srivastava, A,K. Behavior of riboflavin on plain carbon paste and aza macrocycles based chemically modified electrodes, *Sensor Actua. B* **2007**,124, 90.
- (3) Ly,Y.; Yoo, H.S.; Ahn, J.Y.; Nam, K.H. Pico molar assay of riboflavin in human urine using voltammetry, *Food Chem.* **2011**, 127, 270.
- (4) Balco, E.; Dominguez, C.S.H.; Hernandez, Alkanethiols, J.V. Modified Gold Electrodes for Selective Detection of Molecules with Different Polarity and Molecular Size. Application to Vitamin B2 Analysis *Electroanalysis* **2009**, 21, 495.
- (5) Safavi, A.; Maleki, N.; Ershadifar, H.; Tajabadi, F. Development of a sensitive and selective Riboflavin sensor based on carbon ionic liquid electrode, *Anal. Chim. Acta* **2010**, 674, 176.
- (6) Bas .S.Lakubowska, S.; Girski, M. Application of renewable silver amalgam annular band electrode to voltammetric determination of vitamins C, B<sub>1</sub> and B<sub>2</sub>, *Talanta* **2011**, 84,1032.
- (7) Bandzuchova, L.; Selesovska, R.; T.Navratil, T.; Chylkov, J. Voltammetric monitoring of electrochemical reduction of riboflavin using silver solid amalgam electrodes, *Electrochim. Acta* **2012** ,75,316
- (8) Li, Y.; Hsu, P. C.; S.M. Chen. Multi-functionalized biosensor at WO<sub>3</sub>-TiO<sub>2</sub> modified electrode for photoelectrocatalysis of norepinephrine and riboflavin, *Sensor Actuat. B* **2012**, 174, 427.
- (9) Ensafi, Heydari-Bafrooei, E.; Amini, M. DNA-functionalized biosensor for riboflavin based electrochemical interaction on pretreated pencil graphite electrode, *Biosens. Bioelectron.* **2012**,31,376.

- (10) Lavanya, N.; Radhakrishnan, S.; Sekar, C.; Navaneethan, M. Fabrication of Cr doped SnO<sub>2</sub> nanoparticles based biosensor for the selective determination of riboflavin in pharmaceuticals, *Analyst* **2013**, 138, 2061.
- (11) Sumathi, C.; Muthukumar, P.; Radhakrishnan, S.; Ravi, G.; Wilson, J. Riboflavin detection by  $\alpha$ -Fe<sub>2</sub>O<sub>3</sub>/MWCNT/AuNPs-based composite and a study of the interaction of riboflavin with DNA. *RSC Adv.* **2015**, 5, 17888-17896

**Table S4** Determination of the riboflavin content in commercial pharmaceutical products and milk powder by SWV on the 5 wt. % of Ce-doped NiO modified electrode.

| Sample               | Reported content (mg) | Content found (mg) | Recovery % |
|----------------------|-----------------------|--------------------|------------|
| multivitamin tablet  | 1.6                   | 1.45               | 90.6       |
| multivitamin capsule | 2                     | 1.8                | 90         |
| Milk powder          | 0.78                  | 0.70               | 89.7       |
